# Supplementary material for: Trends and variability in snowmelt in China under climate change
Source: Copernicus journal article supplement (doi:10.5194/hess-2021-433), 2021-09-06
Supplement: Supplementary file 1 [file hess-2021-433-supplement.zip]

**Table S1. Ratios of snow sublimation to snowfall from published literatures**

| Numbers | Longitude           | Latitude          | Elevation<br>(m) | Climate<br>zones | Snow types     | Ratio (%) | Methods                             | Reference              |
|---------|---------------------|-------------------|------------------|------------------|----------------|-----------|-------------------------------------|------------------------|
| 1       | 87°56'              | 44°22'            | 460              | TCZ              | Ephemeral      | 23.63     | Snow lysimeters                     | (Zhou et al., 2012)    |
| 2       | 87°55'              | 44°22'            | 440              | TCZ              | Ephemeral      | 6.51      | Evaporation pan measurements        | (Zhou, 2009)           |
| 3       | 87°56'              | 44°17'            | 460              | TCZ              | Ephemeral      | 7.37      | Evaporation pan measurements        | (Zhou, 2009)           |
| 4       | 86°50'              | 43° 06'           | 3540             | TCZ              | Tundra         | 50-100    | Evaporation pan measurements        | (Yang and Zhang, 1992) |
| 5       | 84°24'              | 43°16'            | 1776             | TCZ              | Tundra         | 4.0-12.5  | Snow lysimeter and surface energy   | (Lu et al., 2016)      |
| 6       | 84°24'              | 43°16'            | 1776             | TCZ              | Tundra         | 11.3      | Evaporation pan measurements        | (Wang and Wei, 1994)   |
| 7       | 71°39'-<br>93°45'   | 34°20'-<br>43°39' | 750-7623         | TCZ              | All types      | 50        | Hydrological model                  | (Paix et al., 2011)    |
| 8       | 100°15'             | 38°32'            | 2835             | MPZ              | Taiga          | High      | Energy balance method               | (Zhu et al., 2014)     |
| 9       | 100°11'-<br>100°18' | 38°05'-<br>38°50' | 3440-<br>4400    | MPZ              | Mountain/taiga | 47        | Hydrological model                  | (Zhou et al., 2014)    |
| 10      | 100°13'             | 38°04'            | 3449.4           | MPZ              | Mountain       | 68.8      | Energy balance method               | (Li et al., 2009)      |
| 11      | 97°30'-<br>101°16'  | 37°30'-<br>34°10' | 1600-<br>5500    | MPZ/TCZ          | All types      | 38.9      | Hydrological model                  | (Li et al., 2019)      |
| 12      | 85.6167°            | 28.2333°          | 5120             | MPZ              | Tundra         | 21        | Bulk-aerodynamic method             | (Stigter et al., 2018) |
| 13      | 92.06°              | 31.48°            | 4700             | MPZ              | Tundra         | 42.5-100  | Heat budget method                  | (Ueno et al., 2007)    |
| 14      | 128°6'              | 42°24'            | 738              | TMZ              | Tundra         | 33.3      | Eddy covariance and snow lysimeters | (Li et al., 2016)      |
| 15      | 122°20'             | 53°28'            | 323              | TMZ              | Taiga          | 7.9-9.0   | Eddy covariance method              | (Lin et al., 2021)     |
| 16      | 122°20'             | 53°28'            | 323              | TMZ              | Taiga          | 9.8-11.4  | Surface temperature technique       | (Lin et al., 2021)     |
| 17      | 122°20'             | 53°28'            | 323              | TMZ              | Taiga          | 11.1-14.5 | Penman combination                  | (Lin et al., 2021)     |
| 18      | 107°20'             | 47°42'            | 1415             | TCZ              | Prairie        | 20.3      | Aerodynamic profile method          | (Zhang et al., 2008)   |
| 19      | 107°25'             | 47°68'            | 1640             | TCZ              | Prairie        | 21.6      | Aerodynamic profile method          | (Zhang et al., 2008)   |

**Note.** MPZ, mountain plateau zone; TMZ, temperate monsoon zone; TCZ, temperate continental zone. The spatial distribution of the study regions was shown in Figure S1.

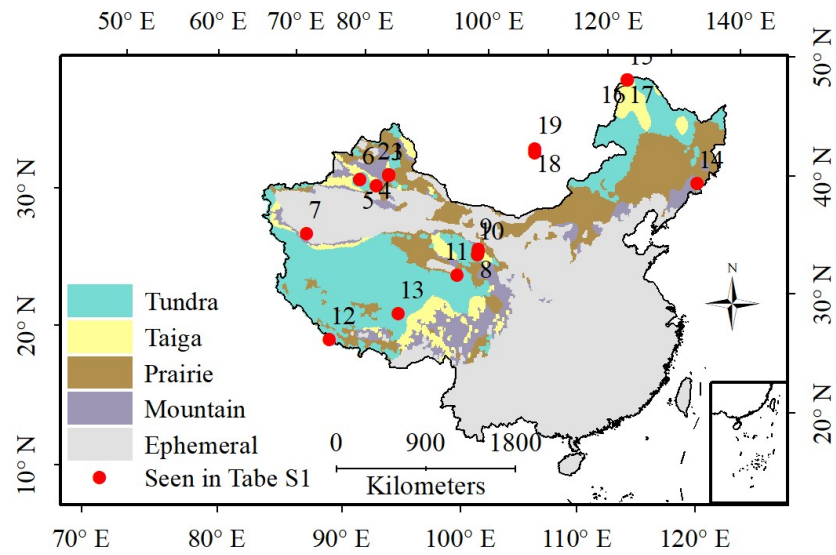

**Figure S1. Spatial distribution of the study regions on the ratios of snow sublimation to snowfall from published literatures. (Numbers in the Figures were explained in Table S1)**

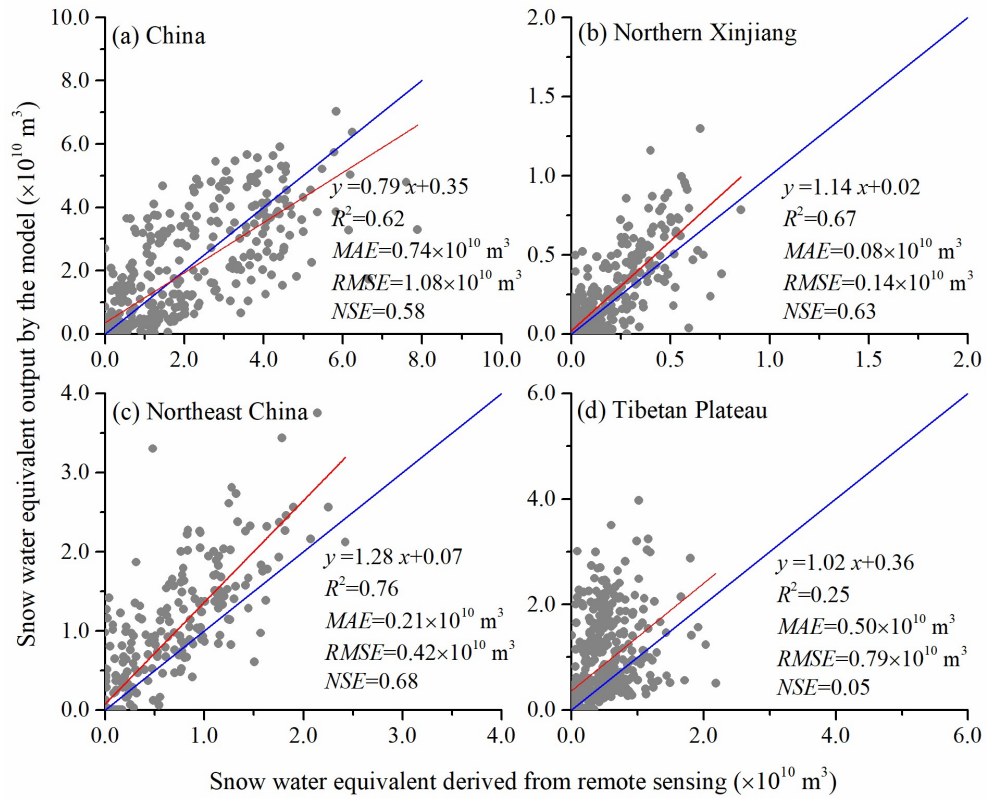

**Figure S2.** Scatterplots of the snow water equivalent output by the model and derived from remote sensing in China and its three main stable snow cover regions (snow water equivalent was removed from the glacier areas, and the glacier distribution data were obtained from the second glacial catalogue data set of China, the National Cryosphere Desert Data Center, <https://www.ncdc.ac.cn>). The red and blue solid lines are the linear fit and the 1:1 line, respectively.

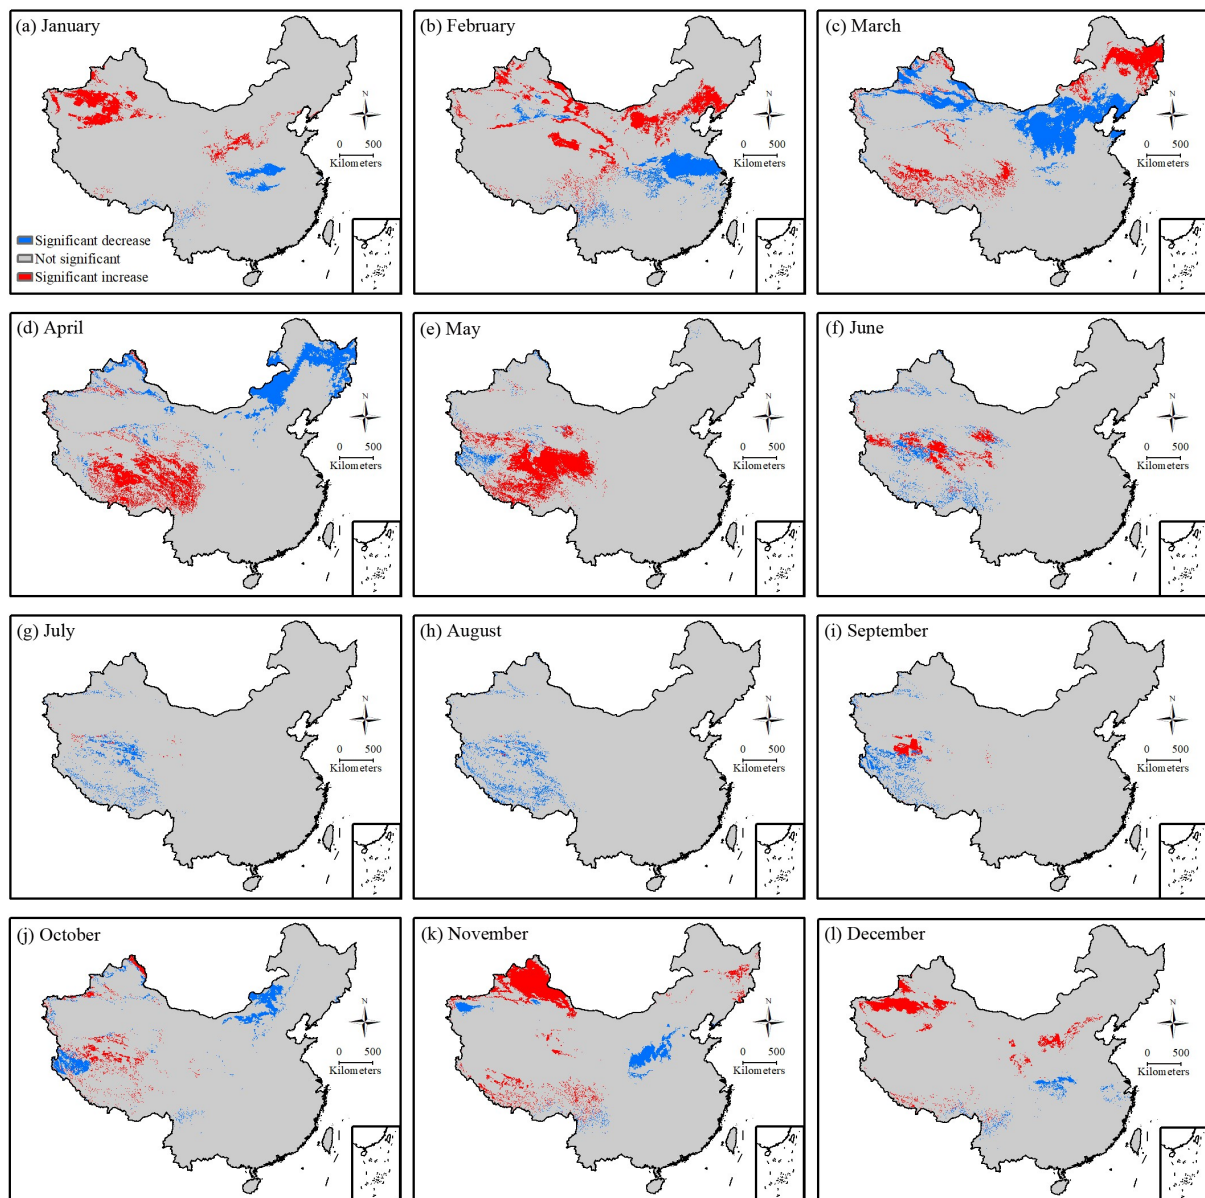

**Figure S3. Trends of snowmelt in 12 months based on the Mann-Kendall method in China during the 1951-2017 period.**

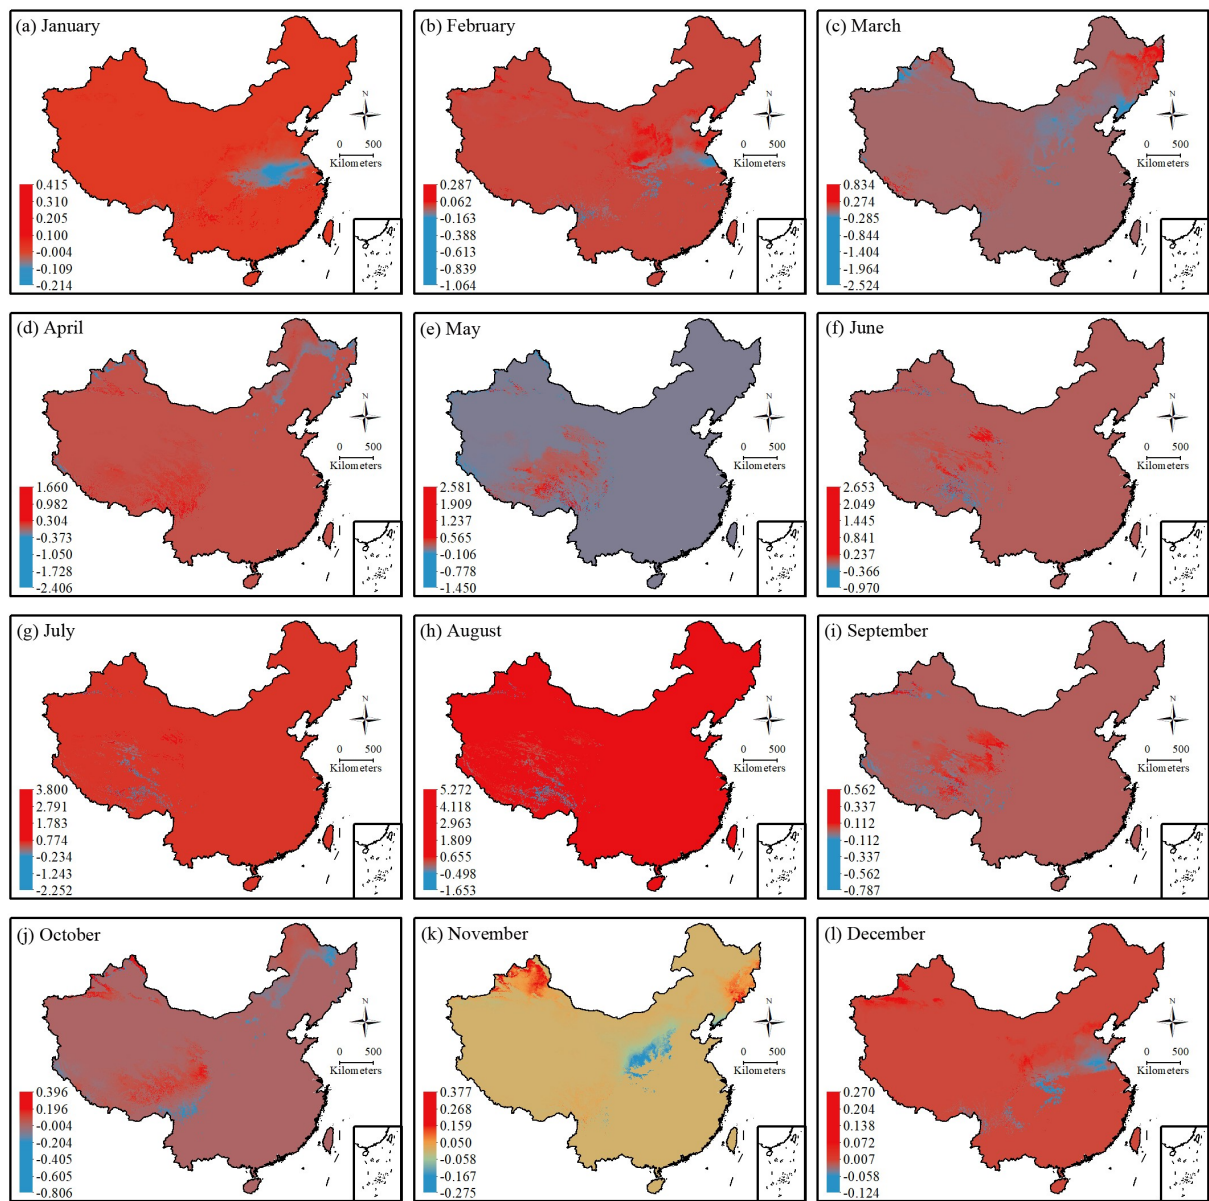

Figure S4. Sen's slope (mm month<sup>-1</sup>) of snowmelt in 12 months in China during the 1951-2017 period.

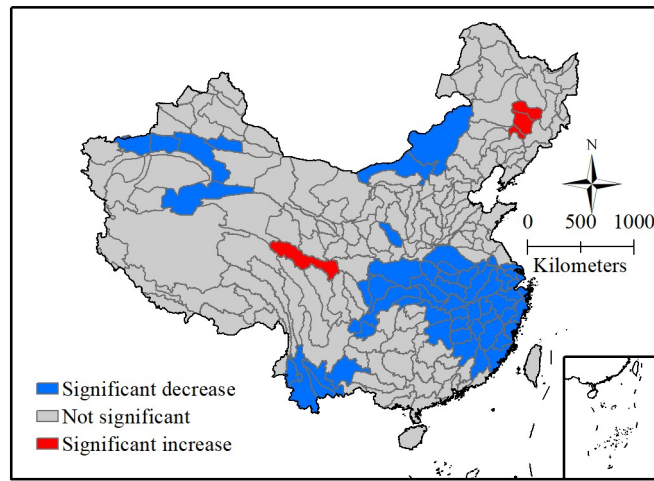

**Figure S5.** Trends of annual snowmelt runoff ratio at third-level basins based on the Mann-Kendall method in China during the 1951-2017 period.



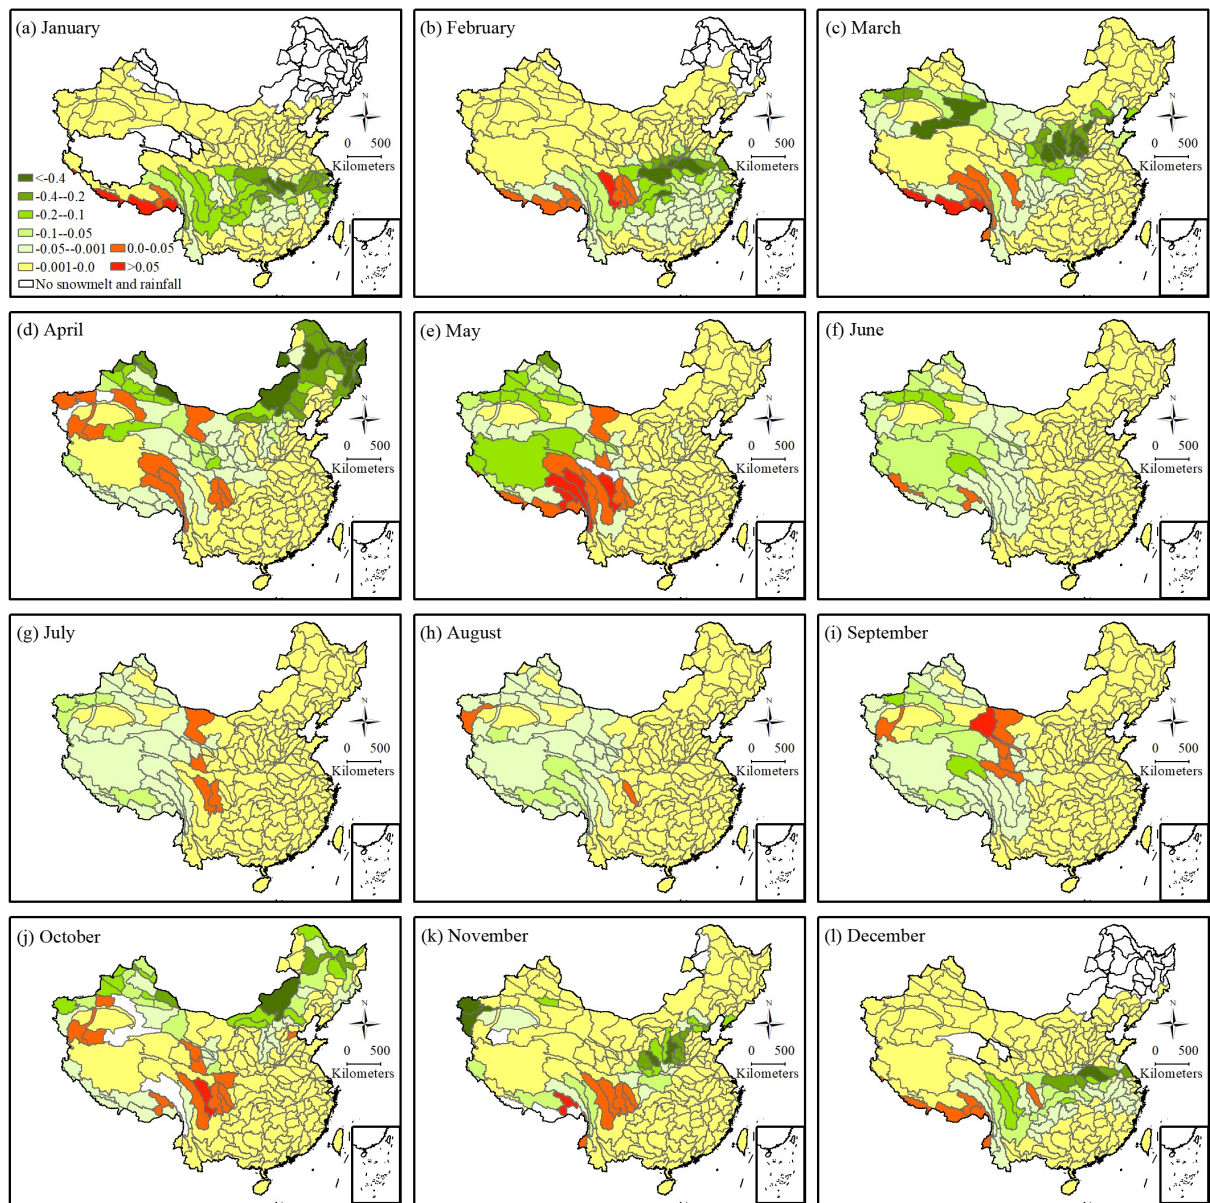

**Figure S6.** Spatial distributions of the Sen's slope of snowmelt runoff ratio (% month<sup>-1</sup>) in 12 months in third-level basins in China during the 1951-2017 period.

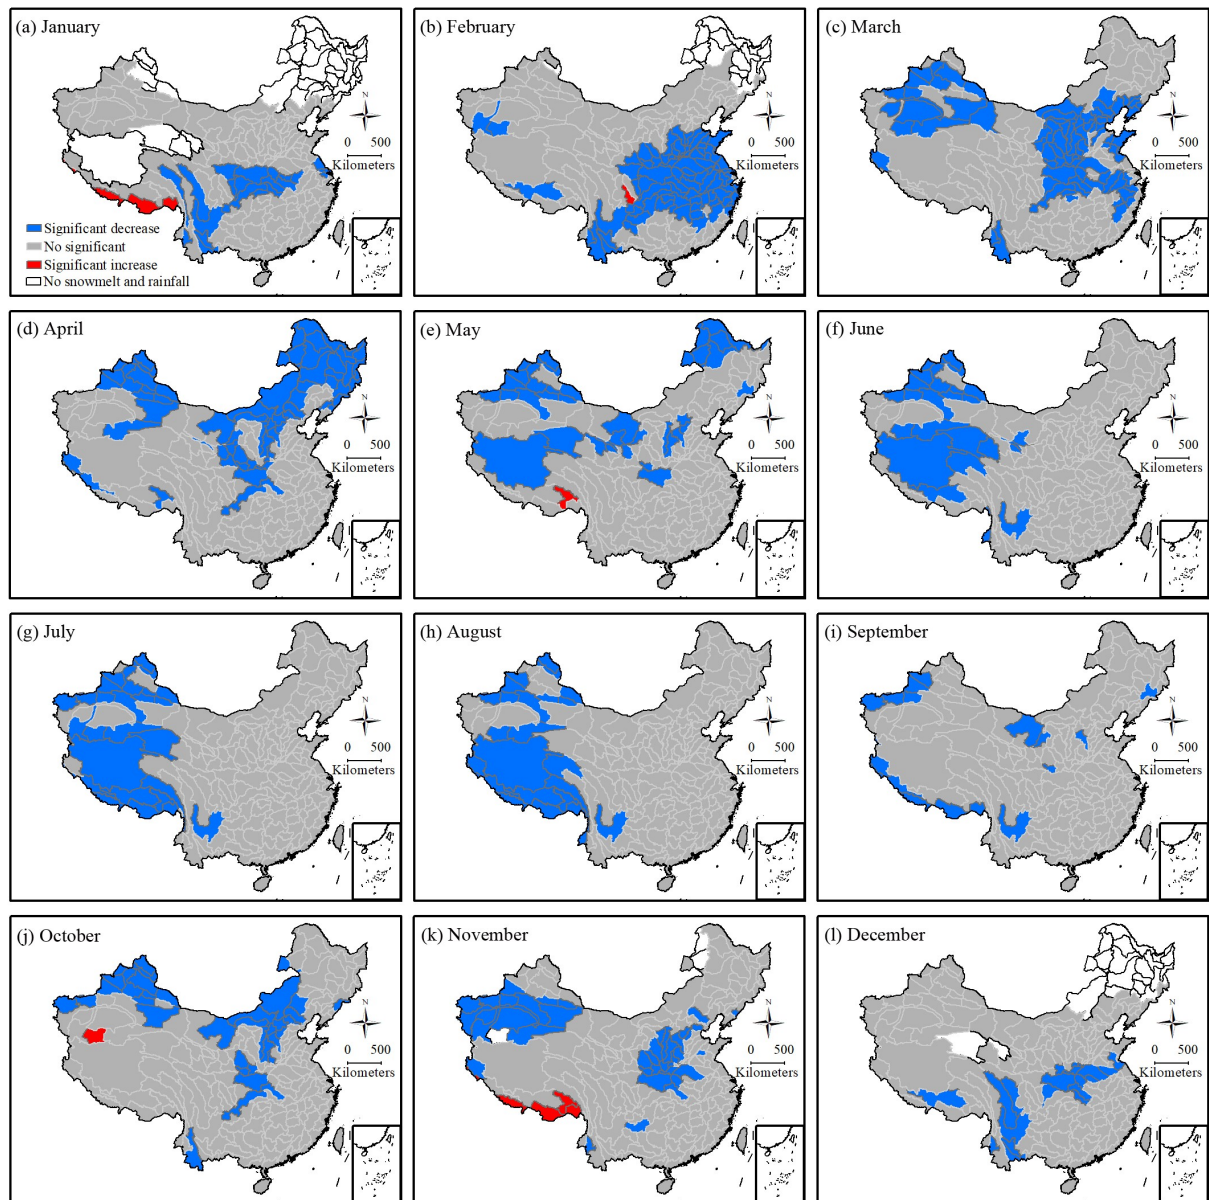

**Figure S7.** Trends of snowmelt runoff ratio in 12 months based on the Mann-Kendall method in China during the 1951-2017 period.



**Table S2. The meanings of the numbers in the legend in Figure 15.**

| Numbers in the legend | Snowmelt | Precipitation | Snowfall | Air temperature | Numbers of grids |
|-----------------------|----------|---------------|----------|-----------------|------------------|
| 1                     | -1       | -1            | -1       | 0               | 100230           |
| 2                     | -1       | -1            | -1       | 1               | 39239            |
| 3                     | -1       | -1            | 0        | 0               | 6627             |
| 4                     | -1       | -1            | 0        | 1               | 5945             |
| 5                     | -1       | 0             | -1       | 0               | 416556           |
| 6                     | -1       | 0             | -1       | 1               | 1224917          |
| 7                     | -1       | 0             | 0        | 0               | 40844            |
| 8                     | -1       | 0             | 0        | 1               | 20032            |
| 9                     | -1       | 1             | -1       | 0               | 32084            |
| 10                    | -1       | 1             | -1       | 1               | 11236            |
| 11                    | -1       | 1             | 0        | 0               | 26046            |
| 12                    | -1       | 1             | 0        | 1               | 186              |
| 13                    | 1        | -1            | -1       | 0               | 32               |
| 14                    | 1        | -1            | 0        | 0               | 73333            |
| 15                    | 1        | -1            | 0        | 1               | 63650            |
| 16                    | 1        | -1            | 1        | 0               | 120886           |
| 17                    | 1        | -1            | 1        | 1               | 161717           |
| 18                    | 1        | 0             | -1       | 0               | 333              |
| 19                    | 1        | 0             | 0        | 0               | 96879            |
| 20                    | 1        | 0             | 0        | 1               | 86846            |
| 21                    | 1        | 0             | 1        | 0               | 119324           |
| 22                    | 1        | 0             | 1        | 1               | 330432           |
| 23                    | 1        | 1             | 0        | 0               | 18137            |
| 24                    | 1        | 1             | 0        | 1               | 98               |
| 25                    | 1        | 1             | 1        | 0               | 5369             |
| 26                    | 1        | 1             | 1        | 1               | 446              |

**Note.** -1, significant decrease; 0, not significant; 1, Significant decrease.

## References

- Li, H., Wang, J., Bai, Y., Li, Z., and Dou, Y.: The snow hydrological processes during a representative snow cover period in Binggou watershed in the upper reaches of Heihe river, *J. Glaciol. Geocryol.*, 31, 293-300, 2009 (in Chinese).
- Li, H., Zhang, Y., Li, X., Yang, D., and Hao, X.: Tracing snowmelt paths in an integrated hydrological model for understanding seasonal snowmelt contribution at basin scale, *J. Geophys. Res. Atmos.*, 124, 8874-8895, <https://doi.org/10.1029/2019JD030760>, 2019.
- Li, H., Wang, A., Guan, D., Jin, C., Wu, J., Yuan, F., and Shi, T.: Empirical model development for ground snow sublimation beneath a temperate mixed forest in Changbai Mountain, *J. Hydrol. Eng.*, 21, 04016040, [https://doi.org/10.1061/\(asce\)he.1943-5584.0001415](https://doi.org/10.1061/(asce)he.1943-5584.0001415), 2016.
- Lin, Y., Cai, T., Ju, C., and Cui, X.: Applicability evaluation and improvement of different snow evaporation calculation methods in the Great Xing'an mountains, *Earth Sci. Inform.*, <https://doi.org/10.1007/s12145-021-00597-3>, 2021.
- Lu, H., Wei, W. S., Liu, M. Z., Han, X., Li, M., and Hong, W.: Variations in seasonal snow surface energy exchange during a snowmelt period: an example from the Tianshan Mountains, China, *Meteorol. Appl.*, 23, 14-25, <https://doi.org/10.1002/met.1511>, 2016.
- Paix, M. J. d. l., Lanhai, L., Jiwen, G., Dieu, H. J. d., and Theoneste, N.: Analysis of snowmelt model for flood forecast for water in arid zone: case of Tarim River in Northwest China, *Environ. Earth Sci.*, 66, 1423-1429, <https://doi.org/10.1007/s12665-011-1353-9>, 2011.
- Stigter, E. E., Litt, M., Steiner, J. F., Bonekamp, P. N. J., Shea, J. M., Bierkens, M. F. P., and Immerzeel, W. W.: The importance of snow sublimation on a Himalayan glacier, *Front. Earth Sci.*, 6, <https://doi.org/10.3389/feart.2018.00108>, 2018.
- Ueno, K., Tanaka, K., Tsutsui, H., and Li, M.: Snow cover conditions in the Tibetan Plateau observed during the winter of 2003/2004, *Arct. Antarct. Alp. Res.*, 39, 152-164, [https://doi.org/10.1657/1523-0430\(2007\)39\[152:Scitt\]2.0.Co;2](https://doi.org/10.1657/1523-0430(2007)39[152:Scitt]2.0.Co;2), 2007.
- Wang, J. and Wei, W.: Observational experiments on evaporation/condensation on snow surface, *Xinjiang Meteorol.*, 17, 38-41, 1994 (in Chinese).
- Yang, D. and Zhang, Y.: Results of snow surface sublimation measurements in the mountain area of Urumqi river basin, *J. Glaciol. Geocryol.*, 14, 122-128, 1992 (in Chinese).
- Zhang, Y., Ishikawa, M., Ohata, T., and Oyunbaatar, D.: Sublimation from thin snow cover at the edge of the Eurasian cryosphere in Mongolia, *Hydrol. Process.*, 22, 3564-3575, <https://doi.org/10.1002/hyp.6960>, 2008.
- Zhou, B.: Experimental study on snow evaporation and condensation in Gurbantunggut desert of China, Master's Thesis, Shihezi University, 2009 (in Chinese).
- Zhou, H., Zheng, X., Zhou, B., Dai, Q., and Li, Y.: Sublimation over seasonal snowpack at the southeastern edge of a desert in central Eurasia, *Hydrol. Process.*, 26, 3911-3920, <https://doi.org/10.1002/hyp.8402>, 2012.
- Zhou, J., Pomeroy, J. W., Zhang, W., Cheng, G., Wang, G., and Chen, C.: Simulating cold regions hydrological processes using a modular model in the west of China, *J. Hydrol.*, 509, 13-24, <https://doi.org/10.1016/j.jhydrol.2013.11.013>, 2014.
- Zhu, G., Lu, L., Su, Y., Wang, X., Cui, X., Ma, J., He, J., Zhang, K., and Li, C.: Energy flux partitioning and evapotranspiration in a sub-alpine spruce forest ecosystem, *Hydrol. Process.*, 28, 5093-5104, <https://doi.org/10.1002/hyp.9995>, 2014.
